# Supplementary material
Source: PubMed Central journal article supplement (PMC1635113)

**A**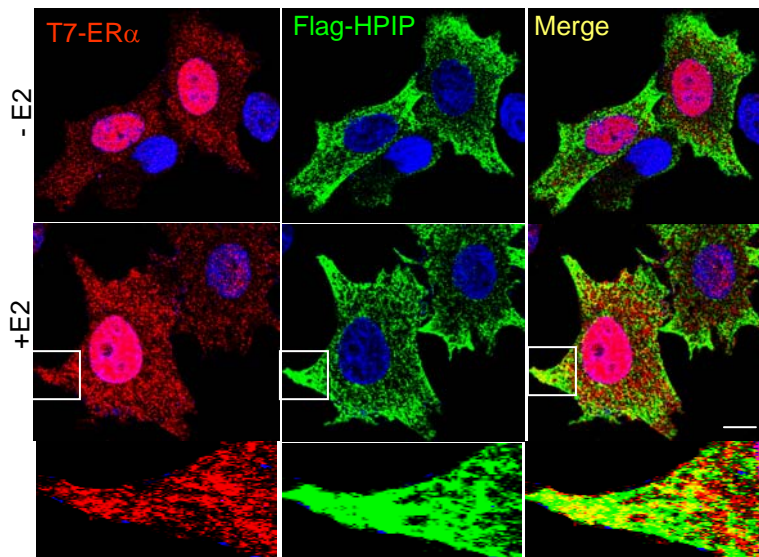**B**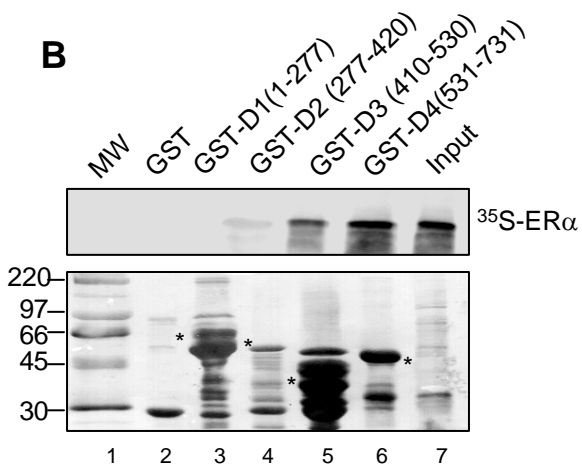**C**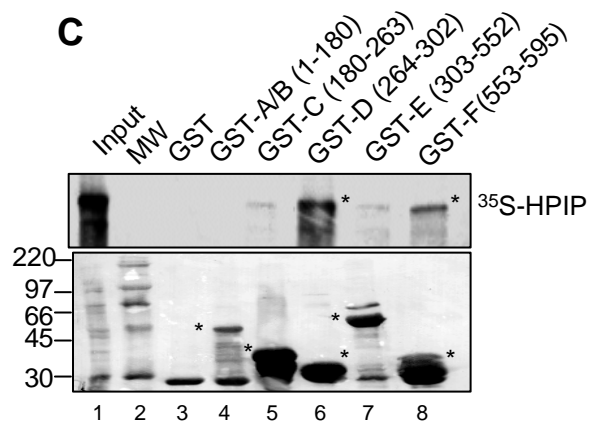

Supplement: pnas_0607445103_2.pdf [file pnas_0607445103_2.pdf]

**A**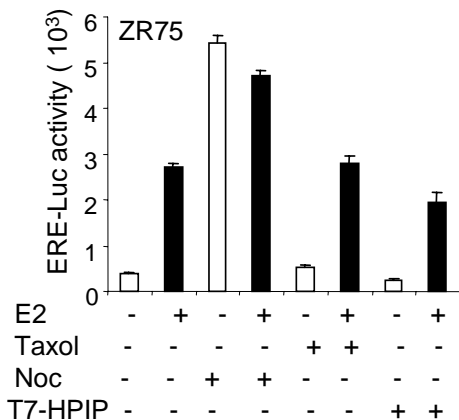**B**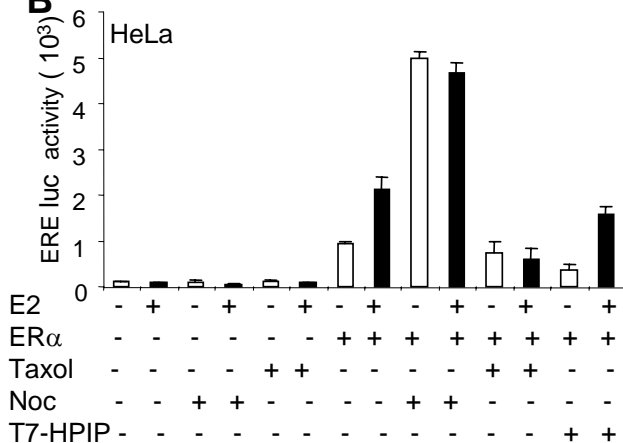**C**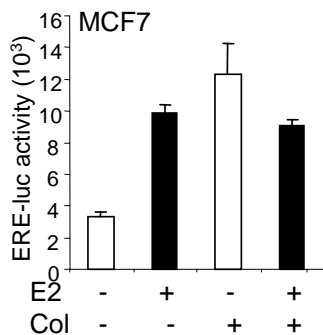**D**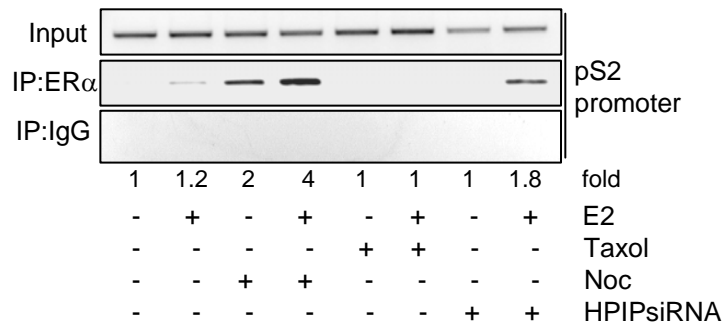

Supplement: pnas_0607445103_5.pdf [file pnas_0607445103_5.pdf]
